# Supplementary material for: Combining discovery and targeted proteomics reveals a prognostic signature in oral cancer
Source: Springer Nature journal article supplement (doi:10.1038/s41467-018-05696-2), 2018-08-30

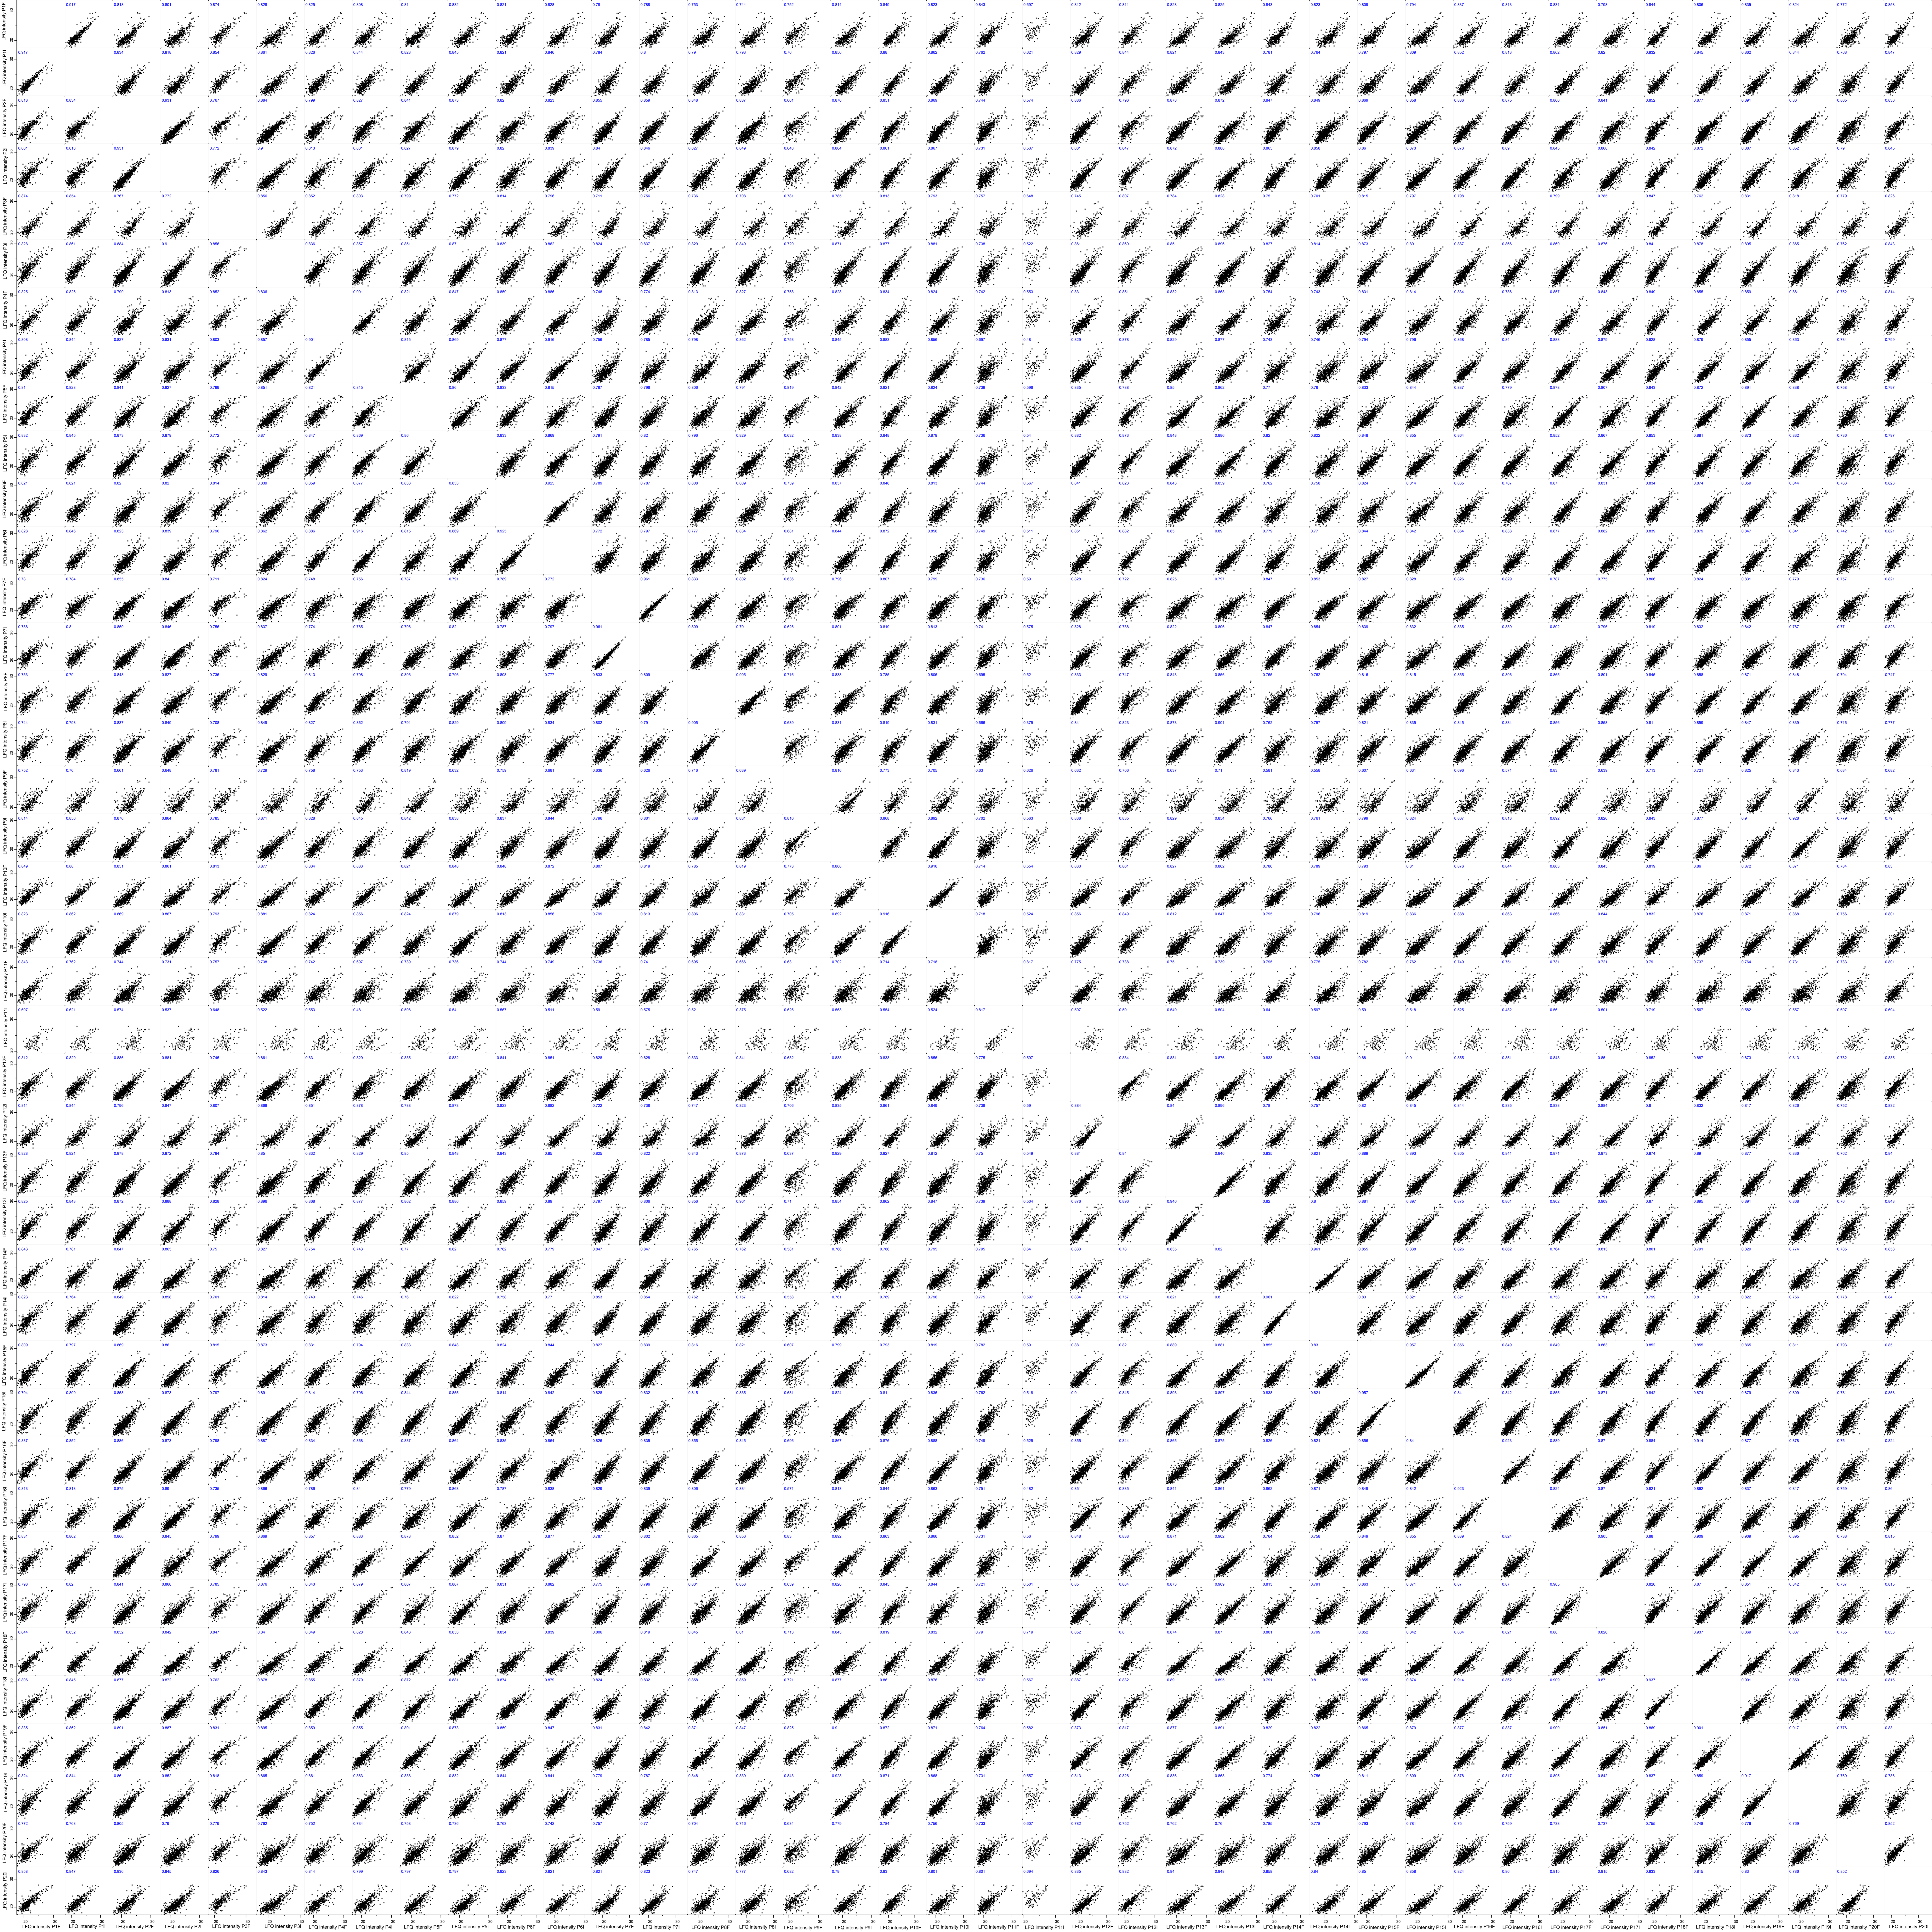

Supplement: 41467_2018_5696_MOESM6_ESM.pdf [file 41467_2018_5696_MOESM6_ESM.pdf]
